# Supplementary material for: Could climate trends disrupt the contact rates between Ixodes ricinus (Acari, Ixodidae) and the reservoirs of Borrelia burgdorferi s.l.?
Source: PubMed Central journal article supplement (PMC7259620; doi:10.1371/journal.pone.0233771), 2020-05-29

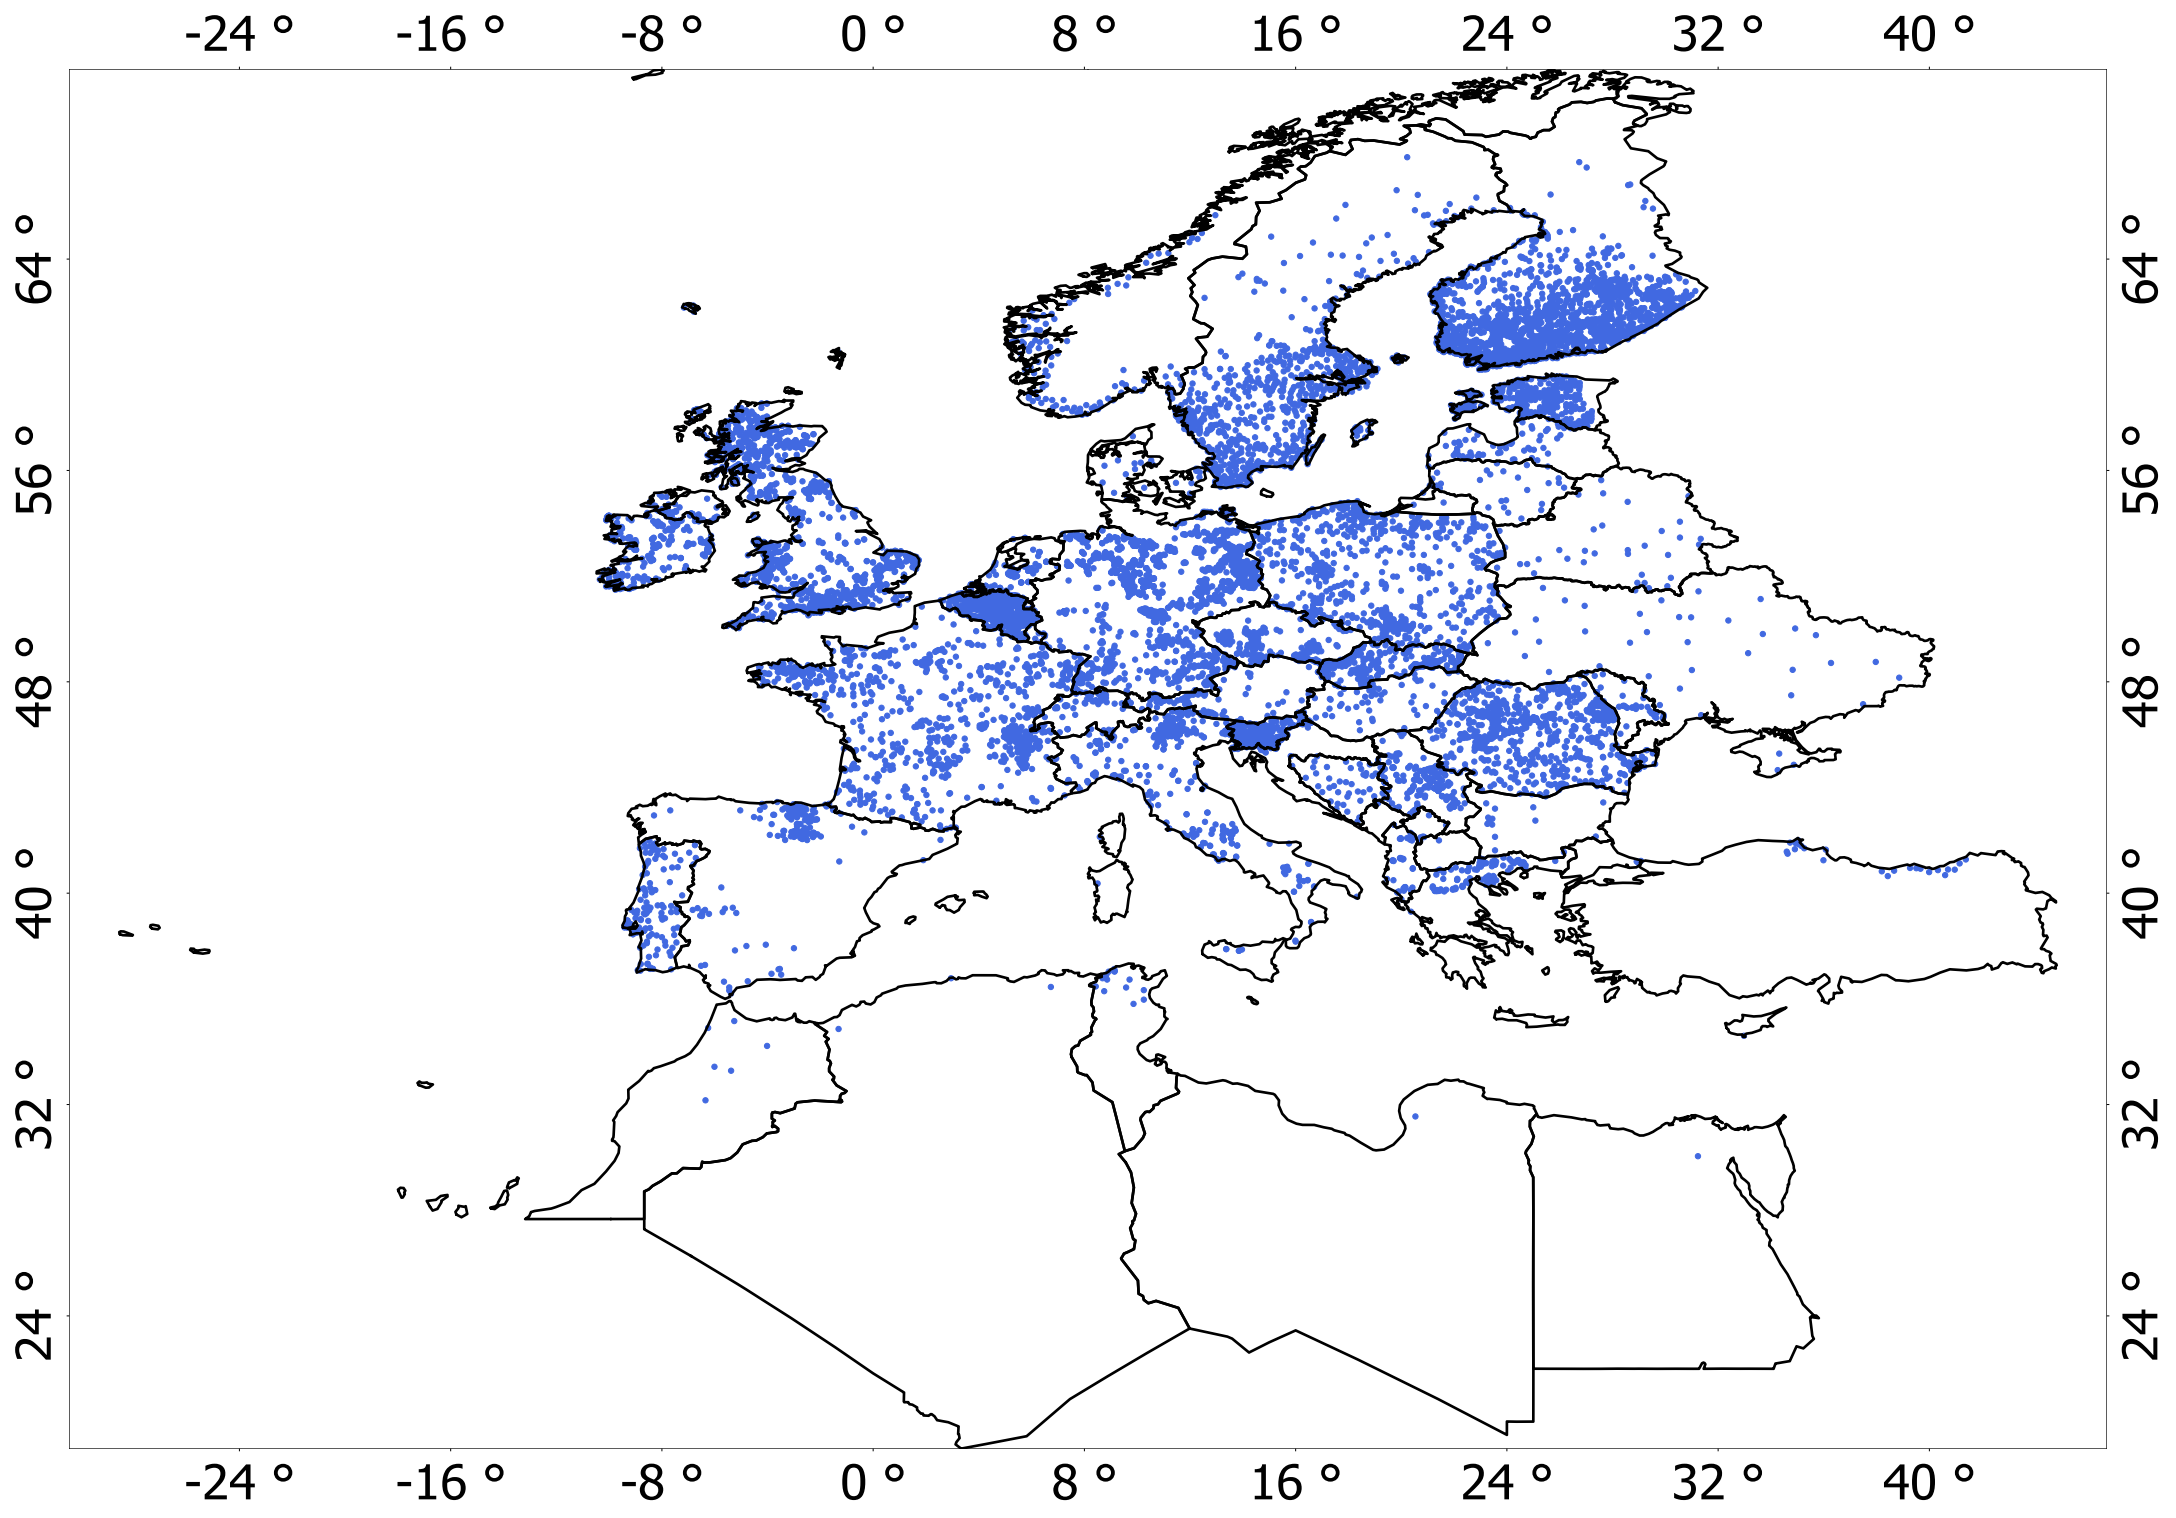

Supplement: pone.0233771.s001.pdf [file pone.0233771.s001.pdf]
